# Supplementary material for: Mobility but Not Balance Limitations Are Associated With Cognitive Decline among Older Hispanics
Source: PubMed Central journal article supplement — Gerontol Geriatr Med. 2020 Aug 13;6:2333721420947952. doi: 10.1177/2333721420947952 (PMC7427021; doi:10.1177/2333721420947952), 2020-08-13
Supplement: Supplementary_Table_S1.pdf [file Supplementary_Table_S1.pdf]

|                                   |              |        |                     |
|-----------------------------------|--------------|--------|---------------------|
| Best                              | Reference    |        |                     |
| Good                              | -0.50 (0.52) | 0.33   |                     |
| Moderate                          | -0.85 (0.58) | 0.14   |                     |
| Poor                              | -1.98 (0.62) | < 0.01 |                     |
| Unable to do                      | -1.99 (0.42) | < 0.01 |                     |
| Physical Performance <sup>c</sup> |              |        | Reference           |
| 9 to 12                           |              |        | -0.96 (0.40) 0.02   |
| 5 to 8                            |              |        | -2.44 (0.49) < 0.01 |
| 1 to 4                            |              |        | -3.53 (0.55) < 0.01 |
| Unable to do                      |              |        |                     |

Interaction of Physical Function and Time

|                                   |              |      |              |        |
|-----------------------------------|--------------|------|--------------|--------|
| Physical Performance <sup>a</sup> | Reference    |      | Reference    |        |
| Best                              |              |      |              |        |
| Good                              | 0.17 (0.09)  | 0.06 | -0.20 (0.08) | 0.02   |
| Moderate                          | 0.11 (0.09)  | 0.21 | -0.21 (0.09) | 0.02   |
| Poor                              | 0.17 (0.08)  | 0.04 | -0.26 (0.11) | 0.02   |
| Unable to Do                      | -0.15 (0.09) | 0.08 | -0.36 (0.10) | < 0.01 |

|                                   |  |  |              |      |
|-----------------------------------|--|--|--------------|------|
| Physical Performance <sup>b</sup> |  |  | Reference    |      |
| Best                              |  |  |              |      |
| Good                              |  |  | 0.07 (0.09)  | 0.44 |
| Moderate                          |  |  | -0.13 (0.10) | 0.19 |
| Poor                              |  |  | -0.06 (0.11) | 0.59 |
| Unable to Do                      |  |  | -0.11 (0.07) | 0.10 |

|                                   |  |  |              |      |
|-----------------------------------|--|--|--------------|------|
| Physical Performance <sup>c</sup> |  |  | Reference    |      |
| 9 to 12                           |  |  |              |      |
| 5 to 8                            |  |  | -0.04 (0.07) | 0.58 |
| 1 to 4                            |  |  | -0.12 (0.08) | 0.16 |
| Unable to Do                      |  |  | -0.22 (0.10) | 0.02 |

Note. SPPB = Short Physical Performance Battery; *b* = estimates of effects; *s.e.* = standard error.

<sup>a</sup> Physical performance was applied to chair standing and walking speed.

<sup>b</sup> Physical performance was applied to balancing.

<sup>c</sup> Physical performance was applied to SPPB score.
