# Supplementary material for: Mobility but Not Balance Limitations Are Associated With Cognitive Decline among Older Hispanics
Source: PubMed Central journal article supplement — Gerontol Geriatr Med. 2020 Aug 13;6:2333721420947952. doi: 10.1177/2333721420947952 (PMC7427021; doi:10.1177/2333721420947952), 2020-08-13
Supplement: Supplementary_Table_S2.pdf [file Supplementary_Table_S2.pdf]

Supplementary Table 2. Pairwise Comparisons of the Estimated Mean of Mini-Mental State Examination Scores and Performance in Lower-Body Function Tasks <sup>a, b</sup>

| <b>Chair Stands</b> |          |       |       |       |     |                                 |       |       |       |     |                                 |       |       |       |     |                                 |       |       |       |     |
|---------------------|----------|-------|-------|-------|-----|---------------------------------|-------|-------|-------|-----|---------------------------------|-------|-------|-------|-----|---------------------------------|-------|-------|-------|-----|
|                     | Baseline |       |       |       |     | 3 <sup>rd</sup> -year follow-up |       |       |       |     | 6 <sup>th</sup> -year follow-up |       |       |       |     | 9 <sup>th</sup> -year follow-up |       |       |       |     |
|                     | (4)      | (3)   | (2)   | (1)   | (0) | (4)                             | (3)   | (2)   | (1)   | (0) | (4)                             | (3)   | (2)   | (1)   | (0) | (4)                             | (3)   | (2)   | (1)   | (0) |
| (4)                 | -        |       |       |       |     | -                               |       |       |       |     | -                               |       |       |       |     | -                               |       |       |       |     |
| (3)                 | -0.8     | -     |       |       |     | -0.2                            | -     |       |       |     | 0.3                             | -     |       |       |     | 0.8                             | -     |       |       |     |
| (2)                 | -0.4     | 0.4   | -     |       |     | -0.0                            | 0.2   | -     |       |     | 0.3                             | 0.0   | -     |       |     | 0.6                             | -0.1  | -     |       |     |
| (1)                 | -0.6     | 0.2   | -0.2  | -     |     | -0.1                            | 0.2   | -0.0  | -     |     | 0.4                             | 0.2   | 0.2   | -     |     | 1.0                             | 0.2   | 0.3   | -     |     |
| (0)                 | -2.8*    | -2.0* | -2.4* | -2.2* | -   | -3.3*                           | -3.0* | -3.2* | -3.2* | -   | -3.7*                           | -4.0* | -4.0* | -4.2* | -   | -4.2*                           | -5.0* | -5.0* | -5.1* | -   |

Note: (4):Best; (3):Good; (2):Moderate; (1):Poor; (0):Unable to Do

| <b>Walking Speed</b> |          |       |       |      |     |                                 |       |       |      |     |                                 |       |       |      |     |                                 |       |       |      |     |
|----------------------|----------|-------|-------|------|-----|---------------------------------|-------|-------|------|-----|---------------------------------|-------|-------|------|-----|---------------------------------|-------|-------|------|-----|
|                      | Baseline |       |       |      |     | 3 <sup>rd</sup> -year follow-up |       |       |      |     | 6 <sup>th</sup> -year follow-up |       |       |      |     | 9 <sup>th</sup> -year follow-up |       |       |      |     |
|                      | (4)      | (3)   | (2)   | (1)  | (0) | (4)                             | (3)   | (2)   | (1)  | (0) | (4)                             | (3)   | (2)   | (1)  | (0) | (4)                             | (3)   | (2)   | (1)  | (0) |
| (4)                  | -        |       |       |      |     | -                               |       |       |      |     | -                               |       |       |      |     | -                               |       |       |      |     |
| (3)                  | 1.1      | -     |       |      |     | 0.5                             | -     |       |      |     | -0.2                            | -     |       |      |     | -0.8                            | -     |       |      |     |
| (2)                  | 0.6      | -0.5  | -     |      |     | -0.1                            | -0.5  | -     |      |     | -0.7                            | -0.5  | -     |      |     | -1.3                            | -0.5  | -     |      |     |
| (1)                  | -1.4*    | -2.4* | -1.9* | -    |     | -2.2*                           | -2.6* | -2.1* | -    |     | -3.0*                           | -2.8* | -2.3* | -    |     | -3.8*                           | -3.0* | -2.4* | -    |     |
| (0)                  | -2.0*    | -3.1* | -2.6* | -0.7 | -   | -3.1*                           | -3.6* | -3.1* | -1.0 | -   | -4.2*                           | -4.1* | -3.5* | -1.3 | -   | -5.3*                           | -4.6* | -4.0* | -1.6 | -   |

Note: (4):Best; (3):Good; (2):Moderate; (1):Poor; (0):Unable to Do

| <b>Balancing</b> |          |       |      |      |     |                                 |       |      |      |     |                                 |       |      |      |     |                                 |       |      |      |     |
|------------------|----------|-------|------|------|-----|---------------------------------|-------|------|------|-----|---------------------------------|-------|------|------|-----|---------------------------------|-------|------|------|-----|
|                  | Baseline |       |      |      |     | 3 <sup>rd</sup> -year follow-up |       |      |      |     | 6 <sup>th</sup> -year follow-up |       |      |      |     | 9 <sup>th</sup> -year follow-up |       |      |      |     |
|                  | (4)      | (3)   | (2)  | (1)  | (0) | (4)                             | (3)   | (2)  | (1)  | (0) | (4)                             | (3)   | (2)  | (1)  | (0) | (4)                             | (3)   | (2)  | (1)  | (0) |
| (4)              | -        |       |      |      |     | -                               |       |      |      |     | -                               |       |      |      |     | -                               |       |      |      |     |
| (3)              | -0.5     | -     |      |      |     | -0.3                            | -     |      |      |     | -0.1                            | -     |      |      |     | 0.1                             | -     |      |      |     |
| (2)              | -0.9     | -0.4  | -    |      |     | -1.2                            | -0.9  | -    |      |     | -1.6*                           | -1.5  | -    |      |     | -2.0                            | -2.1  | -    |      |     |
| (1)              | -2.0*    | -1.5  | -1.1 | -    |     | -2.2*                           | -1.9* | -0.9 | -    |     | -2.3*                           | -2.2* | -0.7 | -    |     | -2.5*                           | -2.6  | -0.5 | -    |     |
| (0)              | -2.0*    | -1.5* | -1.1 | -0.0 | -   | -2.3*                           | -2.0* | -1.1 | -0.2 | -   | -2.7*                           | -2.6* | -1.1 | -0.3 | -   | -3.0*                           | -3.1* | -1.0 | -0.5 | -   |

Note: (4):Full Tandem; (3):Tandem; (2):Semi-Tandem; (1):Side by Side; (0):Unable to Do

**SPPB Score**

|     | Baseline |       |      |     | 3 <sup>rd</sup> -year follow-up |       |       |     | 6 <sup>th</sup> -year follow-up |       |       |     | 9 <sup>th</sup> -year follow-up |       |      |     |
|-----|----------|-------|------|-----|---------------------------------|-------|-------|-----|---------------------------------|-------|-------|-----|---------------------------------|-------|------|-----|
|     | (3)      | (2)   | (1)  | (0) | (3)                             | (2)   | (1)   | (0) | (3)                             | (2)   | (1)   | (0) | (3)                             | (2)   | (1)  | (0) |
| (3) | -        |       |      |     | -                               |       |       |     | -                               |       |       |     | -                               |       |      |     |
| (2) | -1.0     | -     |      |     | -1.1*                           | -     |       |     | -1.2*                           | -     |       |     | -1.3                            | -     |      |     |
| (1) | -2.4*    | -1.5* | -    |     | -2.8*                           | -1.7* | -     |     | -3.2*                           | -2.0* | -     |     | -3.5*                           | -2.2* | -    |     |
| (0) | -3.5*    | -2.6* | -1.1 | -   | -4.2*                           | -3.1* | -1.4* | -   | -4.8*                           | -3.6* | -1.7* | -   | -5.5*                           | -4.2* | -2.0 | -   |

*Note:* (3):9 to 12; (2):5 to 8; (1):1 to 4; (0) Unable to Do

*Note.* SPPB = Short Physical Performance Battery.

<sup>a</sup>Estimated mean MMSE scores were adjusted for baseline demographic and health characteristics shown on Table 2.

<sup>b</sup>\* meant that Tukey adjusted *p* values were less than 0.05 on a multiple comparison.
